# Supplementary material for: Bomb-radiocarbon signal suggests that soil carbon contributes to chlorophyll a in archival oak leaves
Source: Copernicus journal article supplement (doi:10.5194/egusphere-2025-6072), 2025-12-18
Supplement: Supplementary file 1 [file egusphere-2025-6072-supplement.pdf]

Supplemental Information for

# **Bomb-radiocarbon signal suggests that soil carbon contributes to chlorophyll *a* in archival oak leaves**

Naoto F. Ishikawa<sup>1,2,†</sup>, Hisami Suga<sup>1</sup>, Tessa S. van der Voort<sup>2</sup>, Reto Nyffeler<sup>3</sup>, Nanako O.  
Ogawa<sup>1</sup>, Negar Haghipour<sup>2,4</sup>, Lukas Wacker<sup>4</sup>, Timothy I. Eglinton<sup>2</sup> and, Naohiko Ohkouchi<sup>1</sup>

<sup>1</sup>Japan Agency for Marine-Earth Science and Technology, Yokosuka 237-0061, Japan

<sup>2</sup>Department of Earth Sciences, ETH Zürich, 8092 Zürich, Switzerland

<sup>3</sup>Department of Systematic and Evolutionary Botany, University of Zürich, 8008 Zürich,  
Switzerland

<sup>4</sup>Laboratory for Ion Beam Physics, ETH Zürich, 8093 Zürich, Switzerland

<sup>†</sup>Corresponding author. E-mail: [ishikawan@jamstec.go.jp](mailto:ishikawan@jamstec.go.jp)

Running head:  $\Delta^{14}\text{C}$  of chlorophyll *a* in archival oak leaves

## Supplemental Text

To identify and characterize impurity carbon in the purified Pheo *a* fractions, three additional assessments based on (i) diode array detector (DAD), (ii) Orbitrap MS, and (iii) GC/MS spectra were performed. Assessment (i) was subject to all eight samples, while assessment (ii) subject to 1952, 1968, 1973, 1982, and 1995 samples and assessment (iii) subject to 1952 and 1968 samples due to availability of leftover materials after CSRA.

### (i) DAD spectrum

The DAD spectrum of all samples spanning from 300 to 720 nm absorbance was examined at the time window between 16.5 to 20.5 min when the Pheo *a* allomer, Pheo *a*, and Pheo *a* epimer were collected by fraction collector. The HPLC setting was the same as the second-step separation using Eclipse PAH column. Exogeneous compounds having absorbance at the 300–720 nm range were not found (Figure S1). Based on peak areas at 660 nm of Pheo *a* allomer, Pheo *a*, and Pheo *a* epimer, their relative proportion in each sample was estimated (Figure S2).

### (ii) Orbitrap MS spectrum

Selected samples (1952, 1968, 1973, 1982, and 1995 CE) were injected to an UltiMate 3000 and Q Exactive™ Plus Hybrid Quadrupole-Orbitrap™ mass spectrometer (Thermo Fischer Scientific Inc., Waltham, MA, USA) using the electrospray ionization (ESI) method under an infusion mode. Exogeneous compounds that were ionized by ESI were not found except for Pheo *a* allomers (allomer 1:  $m/z$  887.6,  $\text{C}_{55}\text{H}_{74}\text{N}_4\text{O}_6$ , allomer 2:  $m/z$  903.6,  $\text{C}_{55}\text{H}_{74}\text{N}_4\text{O}_7$ , allomer 3:  $m/z$  919.6,  $\text{C}_{55}\text{H}_{74}\text{N}_4\text{O}_8$ , allomer 4:  $m/z$  935.6,  $\text{C}_{55}\text{H}_{74}\text{N}_4\text{O}_9$ ) (Figure S3). The addition of oxygen to the Pheo *a* compound likely occurred in sample preparation and/or storage process due to an exposure to ambient air, which does not increase its C/N nor affect

sample purity for CSRA measurements. Based on peak areas at exact  $m/z$  of Pheo *a* and its allomers, their relative proportion in each sample was estimated (Figure S4). There was a strong positive correlation in proportions of Pheo *a* allomers between DAD-based estimates and Orbitrap MS-based estimates (Figure S5).

(iii) GC/MS spectrum

Selected samples (1952 and 1968CE) were dissolved in *n*-hexane, and loaded on deactivated 1 % H<sub>2</sub>O silica gel columns pre-conditioned with hexane. The N-1, N-2, and N-3 fractions were extracted with *n*-hexane, *n*-hexane/dichloromethane (50:50, v/v), and dichloromethane/methanol (90:10, v/v) respectively. After drying with argon gas, these fractions were redissolved in *n*-hexane/dichloromethane and were injected to a gas chromatograph/mass spectrometer (GC/MS) (Agilent 7890A-GC with Agilent 5975C inert XL MSD) equipped with the VF-5ms column (0.25 mm  $\times$  30 m, film thickness 0.10  $\mu\text{m}$ ) with the electron ionization (EI) method (70eV). The oven temperature was programmed as follows: maintained at 40 °C for 2 min, raised up to 120 °C at 30 °C min<sup>-1</sup>, then to 320 °C at 6 °C min<sup>-1</sup>, and maintained at 320 °C for 20 min. Helium was used as the carrier gas with a constant flow rate of 1 mL min<sup>-1</sup>.

For the N-1 and N-2 fractions, no peaks were found. For the N-3 fraction, peaks around 12–13 min appeared both in the in-house Pheo *a* standard and the samples, suggesting that these are ionized fractions of Pheo *a* compound. Exogenous compounds that were ionized by EI were not found except for pentacyclic triterpenoid compounds ( $\beta$ -amyrin, simiarenol, and their derivatives) eluting around 31–32 min, which were identified by mass fragment patterns (Elgamal et al., 1969; Galeron et al., 2016; Shiojima et al., 1992). (Figures S6–S13).

68 **Supplemental References**

- 69 Elgamal, M. H. A., Fayez, M. B. E., & Kemp, T. R. (1969). The mass spectra of some  
70 triterpenoid dehydration products. *Organic Mass Spectrometry*, 2(2), 175–194.  
71 <https://doi.org/10.1002/oms.1210020204>
- 72 Galeron, M. A., Vaultier, F., & Rontani, J. F. (2016). Oxidation products of  $\alpha$ - And  $\beta$ -  
73 amyrins: Potential tracers of abiotic degradation of vascular-plant organic matter in  
74 aquatic environments. *Environmental Chemistry*, 13(4), 732–744.  
75 <https://doi.org/10.1071/EN15237>
- 76 Shiojima, K., Arai, Y., Masuda, K., Takase, Y., Ageta, T., & Ageta, H. (1992). Mass Spectra  
77 of Pentacyclic Triterpenoids. *Chemical and Pharmaceutical Bulletin*, 40(7), 1683–1690.  
78 <https://doi.org/10.1248/cpb.40.1683>  
79

80



## FIGURE LEGENDS

Figure S1. HPLC/DAD spectrums of Pheo *a* collected through separation using the C18 (1st) and PAH (2nd) columns in (a) 1952 CE, (b) 1965 CE, (c) 1966 CE, (d) 1968 CE, (e) 1973 CE, (f) 1982 CE, (g) 1995 CE, and (h) 2007 CE. Dashed lines indicate fraction collection window (16.5–20.5 min).

Figure S2. DAD peak area (660 nm) percentage of Pheo *a* allomer (16.5–17.8 min), Pheo *a* allomer epimer, Pheo *a* (17.8–19.2 min), and Pheo *a* epimer (19.2–20.5 min).

Figure S3. Orbitrap MS chromatograms of Pheo *a* ( $m/z$  871.6,  $\text{C}_{55}\text{H}_{74}\text{N}_4\text{O}_5$ ) in (a) an in-house standard, (b) 1952 CE, (c) 1968 CE, (d) 1973 CE, (e) 1982 CE, and (f) 1995 CE.

Figure S4. Orbitrap MS peak area percentage of Pheo *a* and its allomers.

Figure S5. Relationship between DAD peak area (660 nm) percentage and Orbitrap MS peak area percentage of Pheo *a* and its allomers. The strong positive correlation corroborates that the compounds are Pheo *a* derivatives (allomers).

Figure S6. Total ion chromatogram of the N-3 fraction (a) in an in-house standard Pheo *a* and (b) in Pheo *a* extracted from the *Quercus pubescens* leaf collected in 1952 CE and purified for CSRA.

Figure S7. (a) Total ion chromatogram and (b) mass spectrum of the first unknown peak of the N-3 fraction in Pheo *a* in 1952 CE. The asterisk denotes the peak for which the mass spectrum is obtained.

106

107 Figure S8. (a) Total ion chromatogram and (b) mass spectrum of the second unknown peak of  
108 the N-3 fraction in Pheo *a* in 1952 CE. The asterisk denotes the peak for which the mass  
109 spectrum is obtained.

110

111 Figure S9. (a) Total ion chromatogram and (b) mass spectrum of the third unknown peak of  
112 the N-3 fraction in Pheo *a* in 1952 CE. The asterisk denotes the peak for which the mass  
113 spectrum is obtained.

114

115 Figure S10. Total ion chromatogram of the N-3 fraction (a) in an in-house standard Pheo *a*  
116 and (b) in Pheo *a* extracted from the *Quercus pubescens* leaf collected in 1968 CE and  
117 purified for CSRA.

118

119 Figure S11. (a) Total ion chromatogram and (b) mass spectrum of the first unknown peak of  
120 the N-3 fraction in Pheo *a* in 1968 CE. The asterisk denotes the peak for which the mass  
121 spectrum is obtained.

122

123 Figure S12. (a) Total ion chromatogram and (b) mass spectrum of the second unknown peak  
124 of the N-3 fraction in Pheo *a* in 1968 CE. The asterisk denotes the peak for which the mass  
125 spectrum is obtained.

126

127 Figure S13. (a) Total ion chromatogram and (b) mass spectrum of the third unknown peak of  
128 the N-3 fraction in Pheo *a* in 1968 CE. The asterisk denotes the peak for which the mass  
129 spectrum is obtained.

130

Figure S14. The observed C/N ratios (right axis in red) and blank carbon % (left axis in blue) for Chl *a* purified from *Quercus* leaf samples plotted against collection year CE. Error bars indicate  $1\sigma$  uncertainties. The dashed red line indicates expected C/N ratios of Chl *a* (11.8). The four older samples collected in 1952, 1965, 1966, and 1968 CE showed significantly higher C/N and blank carbon % than 11.8 and 0, respectively, while the four newer samples collected in 1973, 1982, 1995, and 2007 CE did not.

Figure S15. Heatmaps of the difference ( $\Delta\Delta^{14}\text{C}$ ) between observed and modelled  $\Delta^{14}\text{C}_{\text{Chl}}$  values on a biplot for soil turnover time ( $T_s$ , years) versus soil proportion ( $P_s$ , %) for each of the eight samples collected in different years. The  $\Delta\Delta^{14}\text{C}$  value larger than the  $2\sigma$  analytical error of CSRA ( $>16\text{‰}$ ) was not considered in this plot. The white arrows denote the smallest  $\Delta\Delta^{14}\text{C}$  values (i.e., the most plausible models).

Figure S16. The  $\Delta\Delta^{14}\text{C}$  heatmap that overlayed all the eight heatmaps in Figure S12. The arithmetic mean of the  $\Delta\Delta^{14}\text{C}$  values from the eight years are shown. The white arrow denotes the smallest  $\Delta\Delta^{14}\text{C}$  value (i.e., the most plausible model).

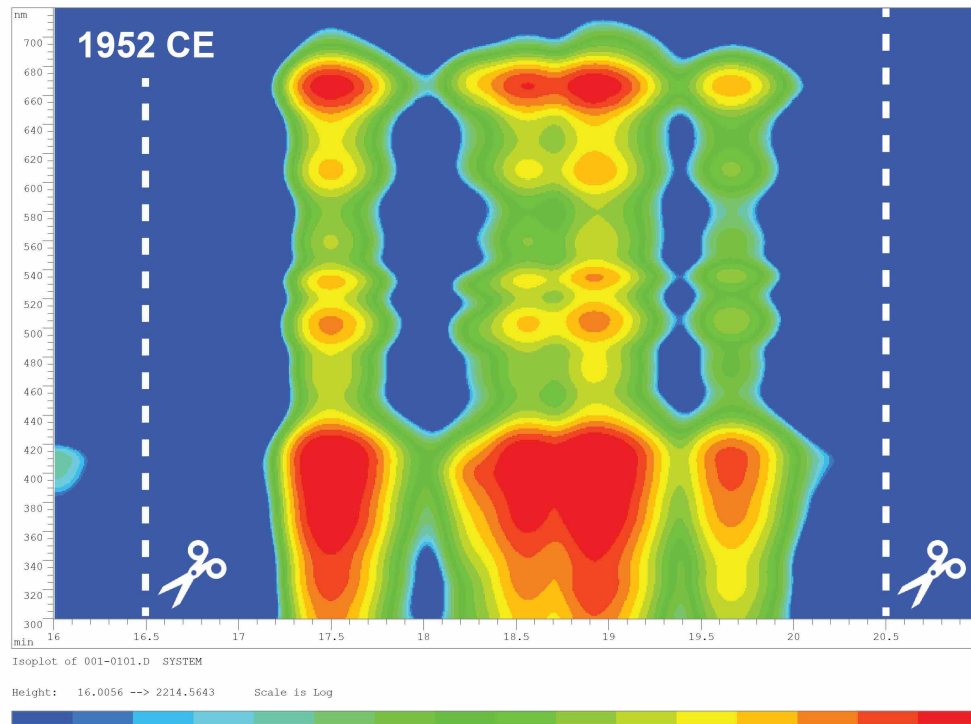

148

149 Figure S1a

150

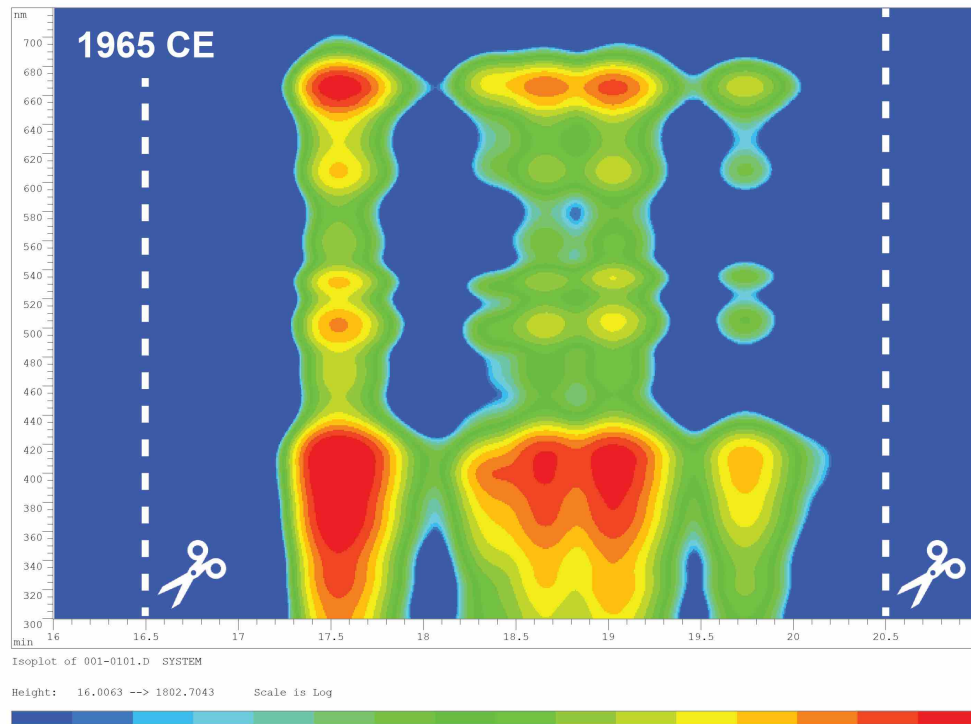

151

152 Figure S1b

153

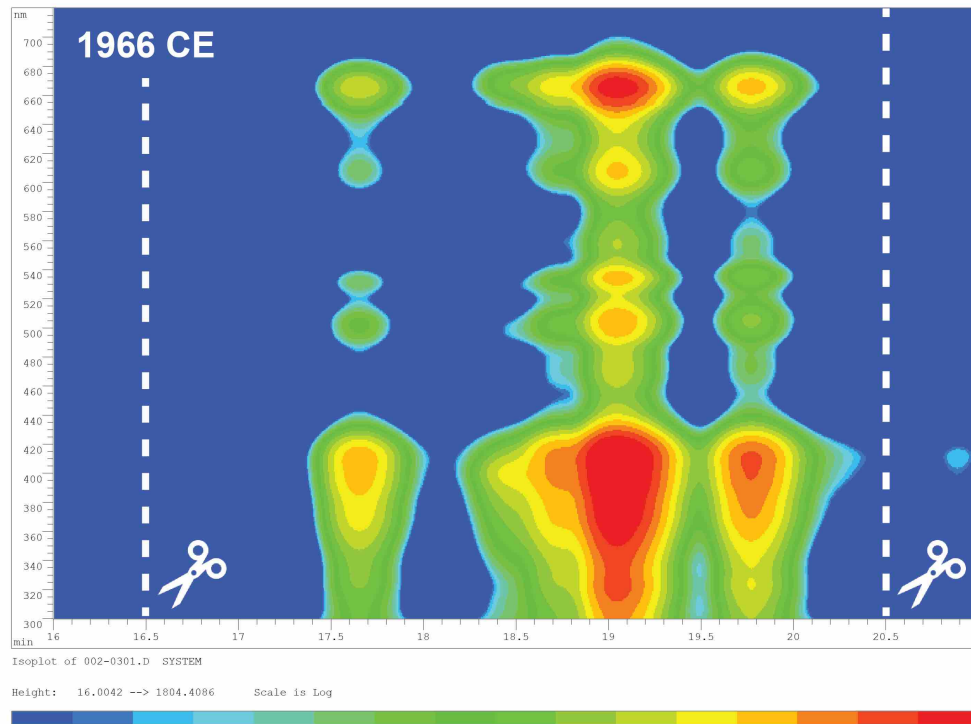

154

155 Figure S1c

156

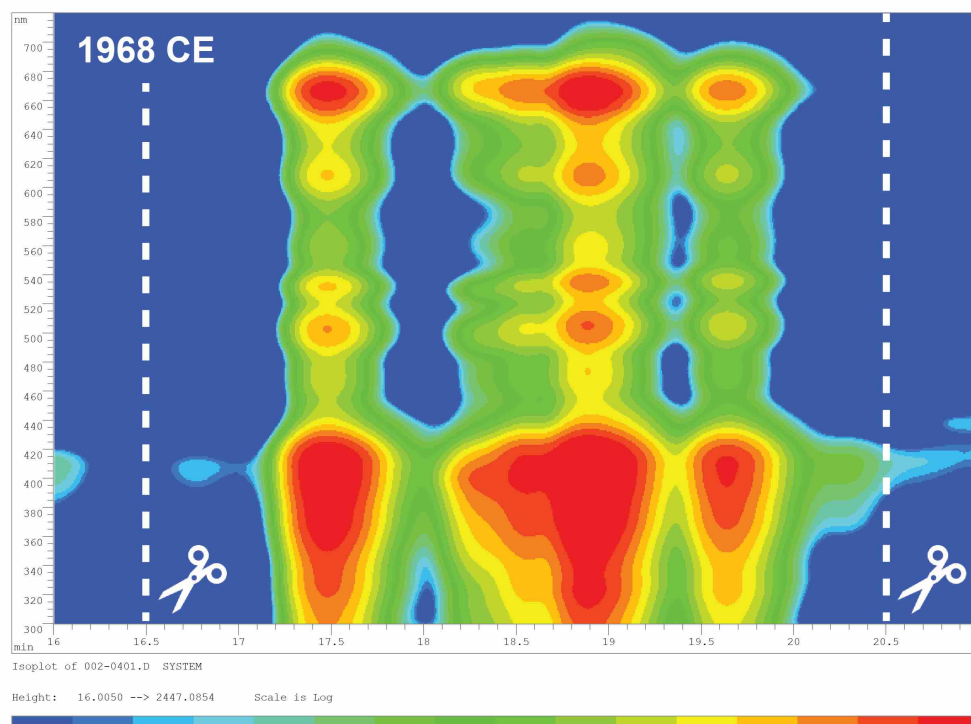

157

158 Figure S1d

159

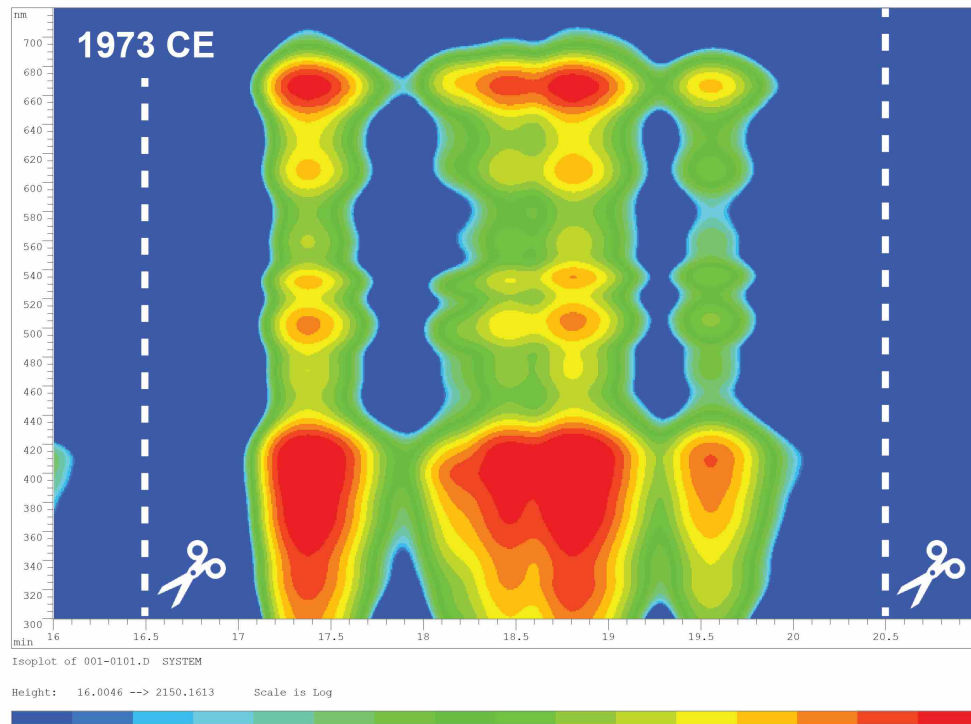

160

161 Figure S1e

162



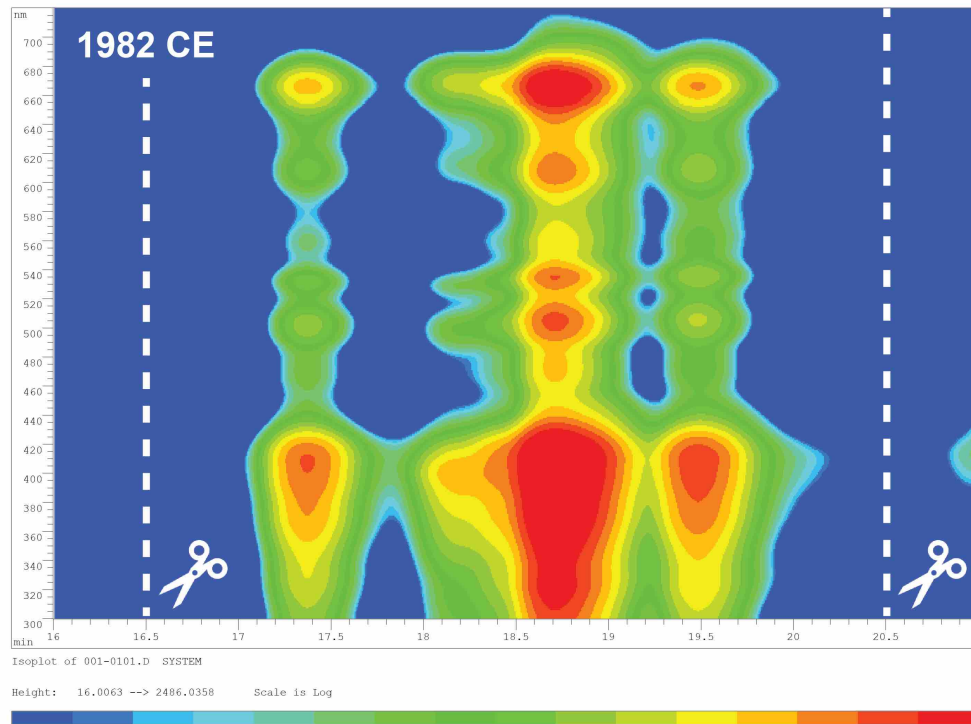

163

164 Figure S1f

165

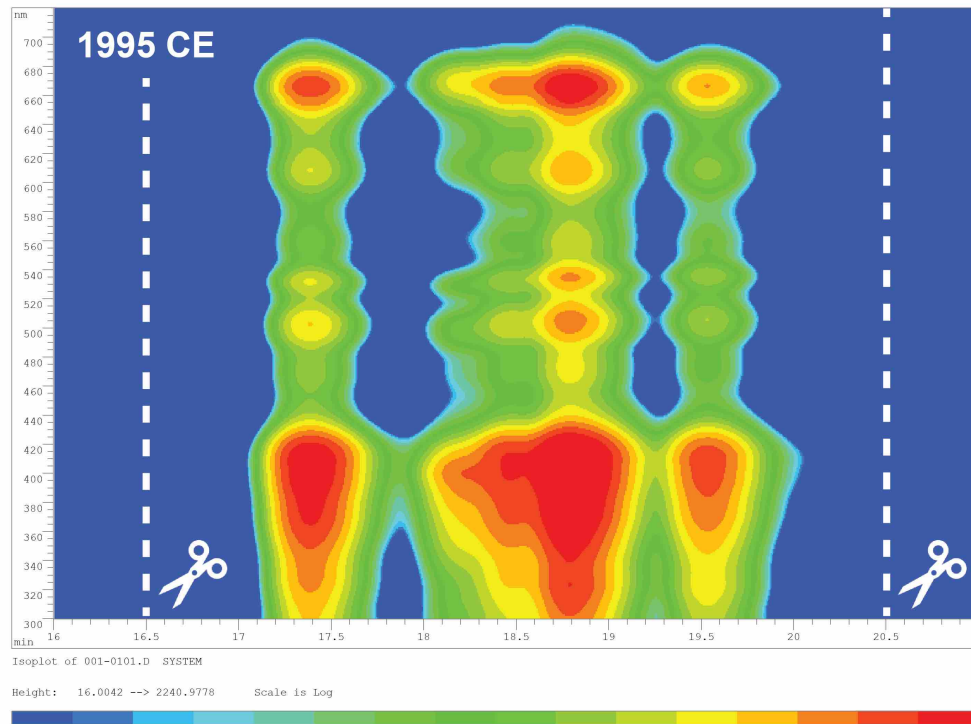

166

167 Figure S1g

168

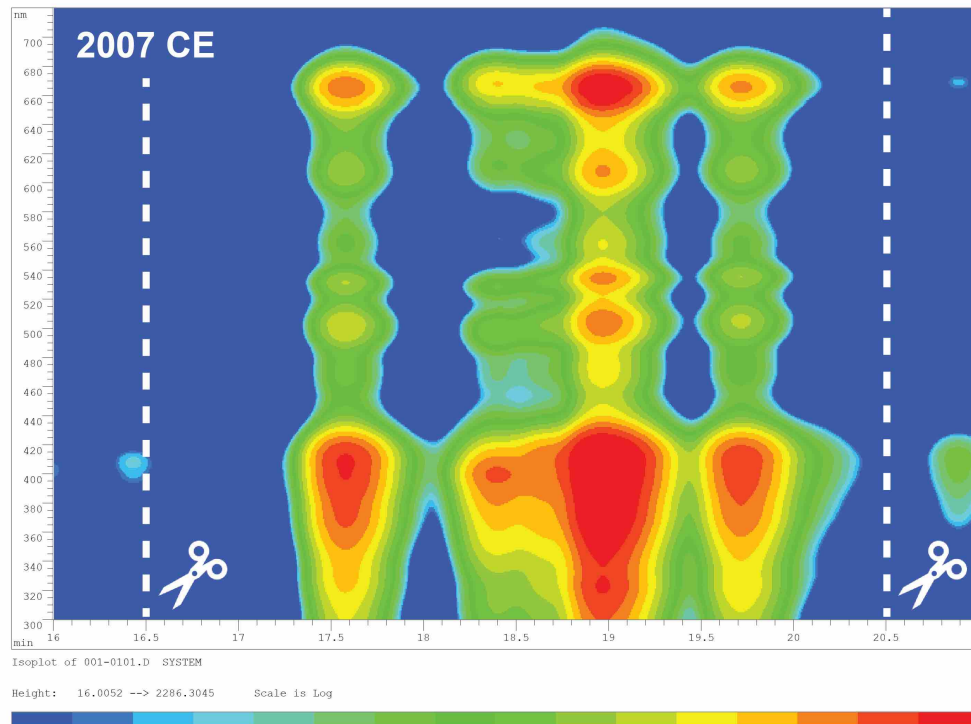

169

170 Figure S1h

171

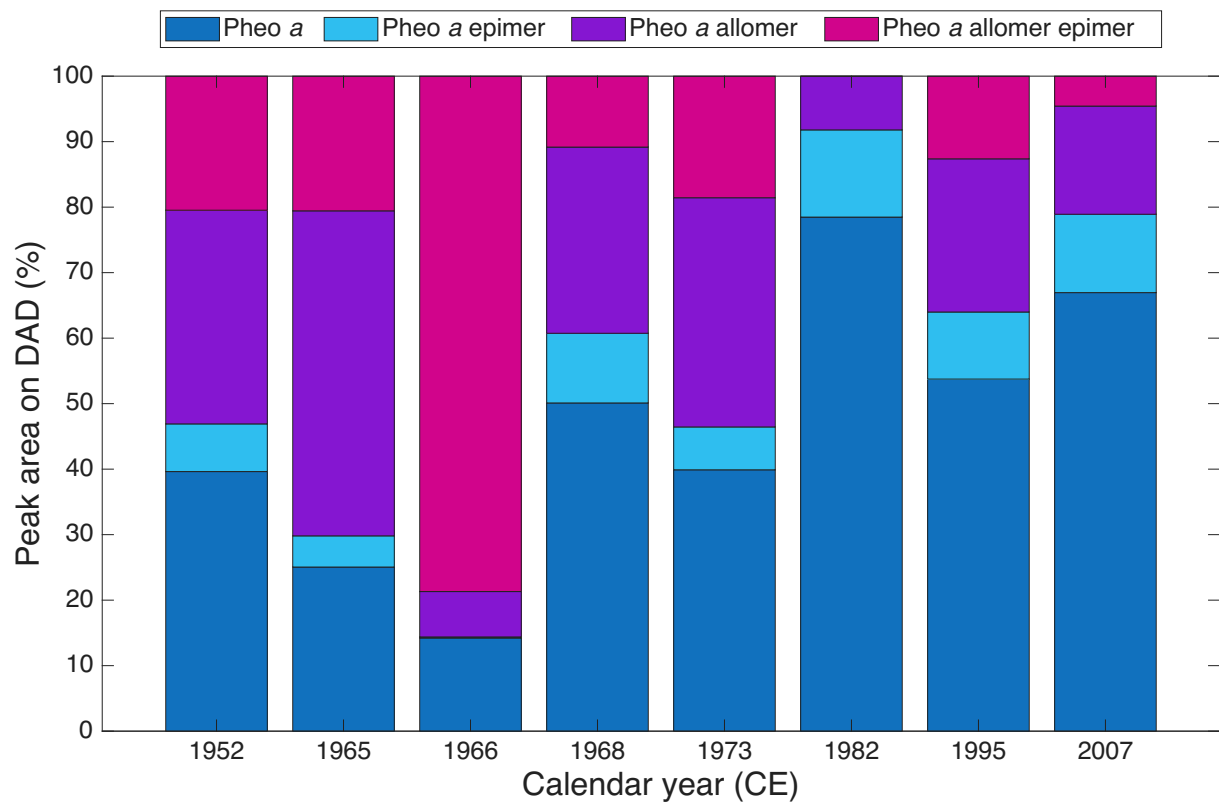

Figure 2

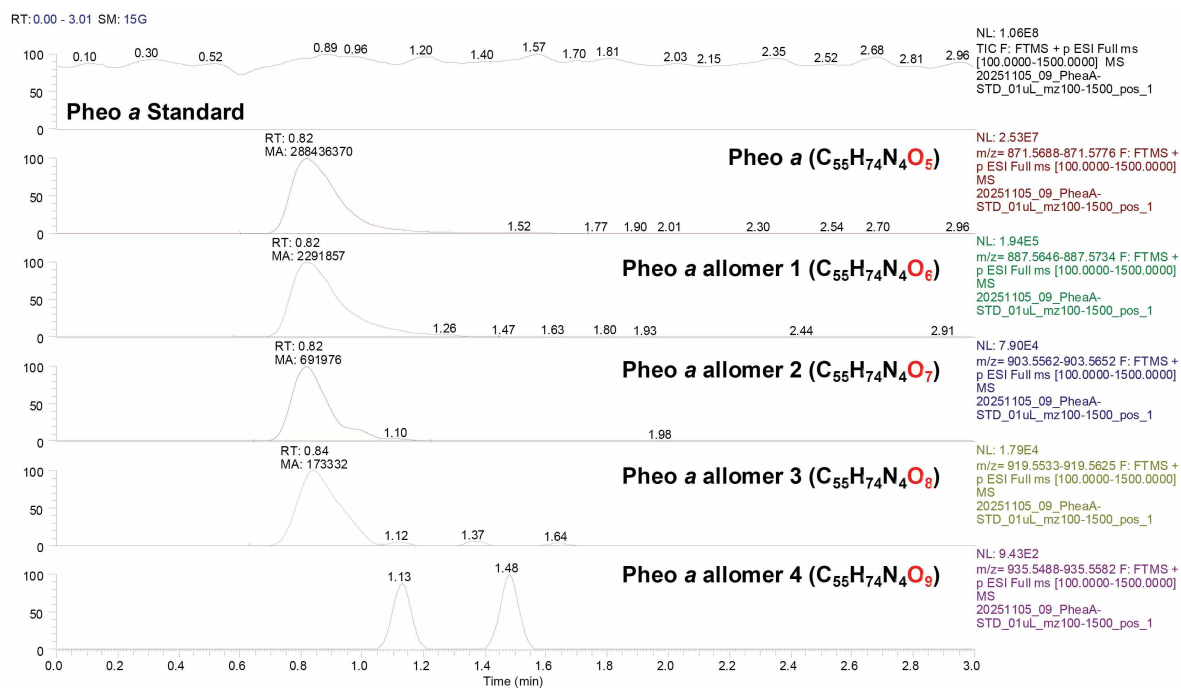

Figure S3a

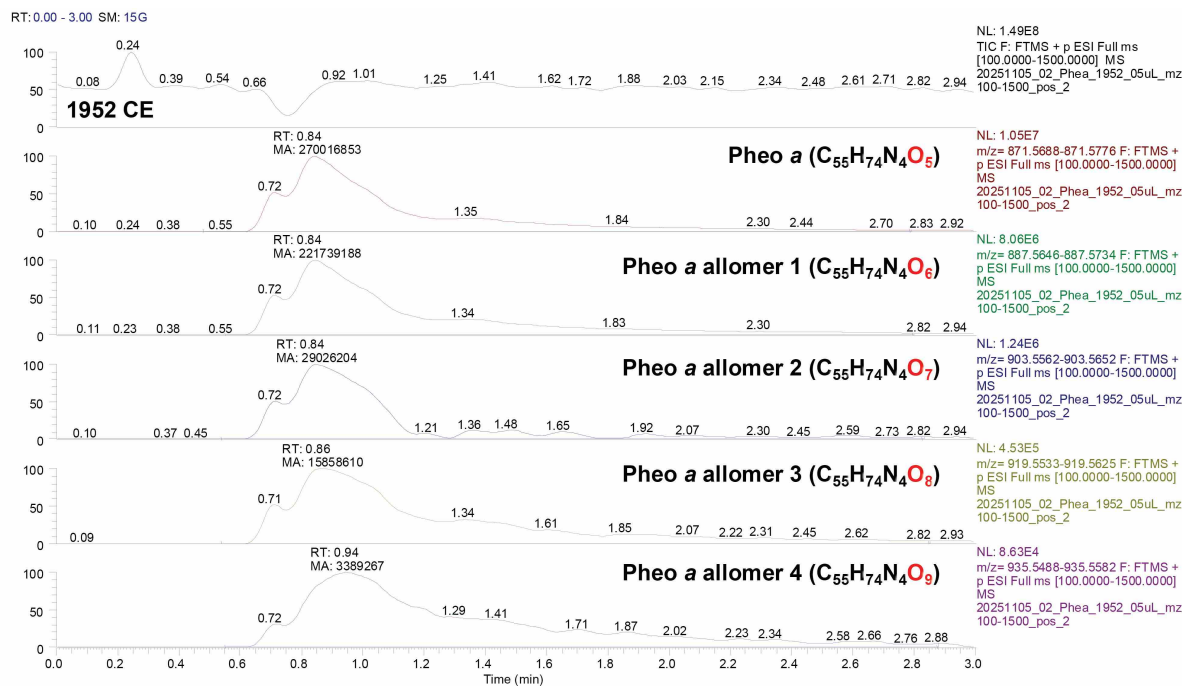

Figure S3b

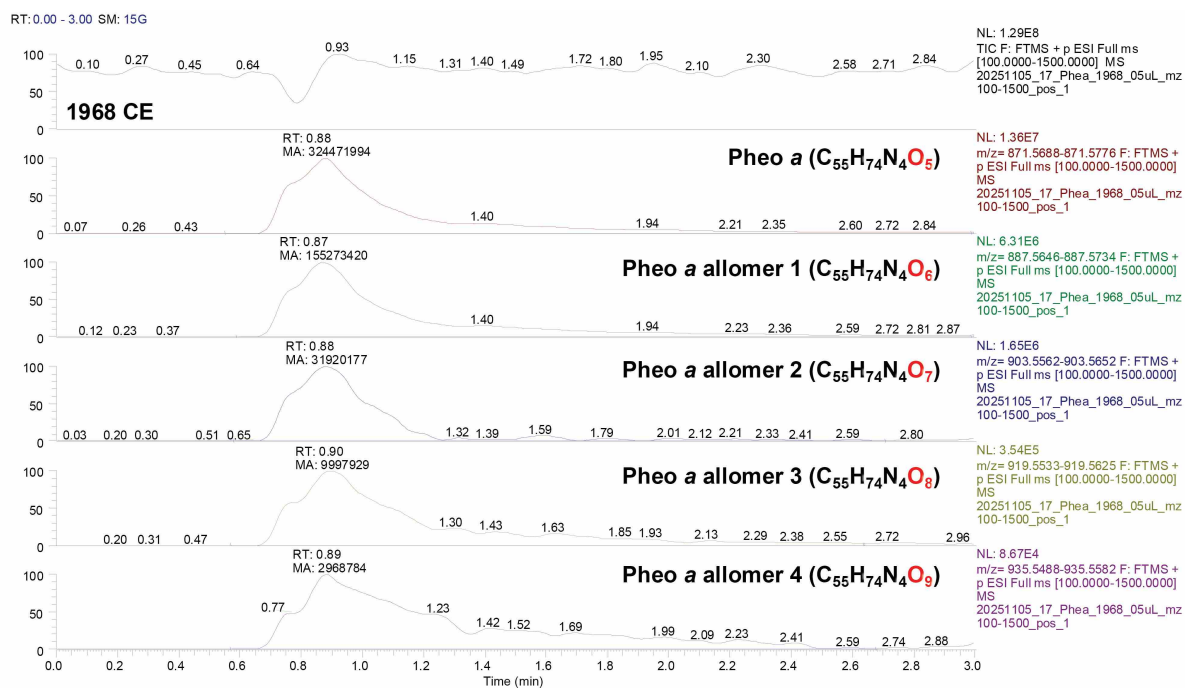

Figure S3c

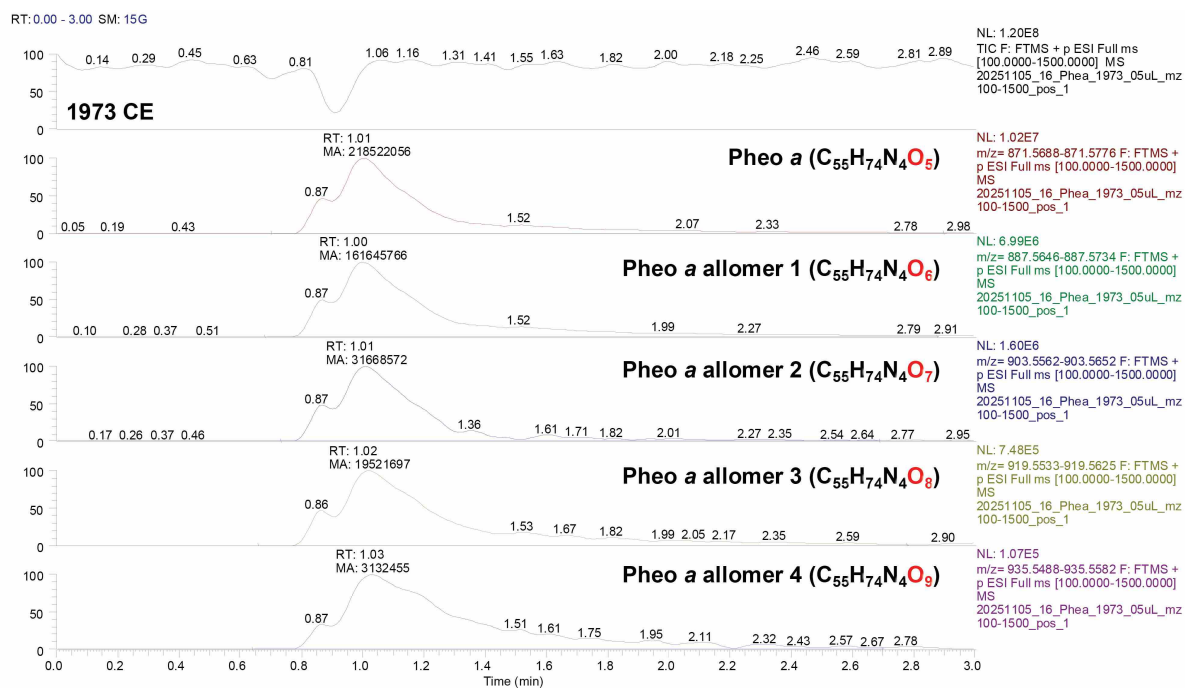

Figure S3d



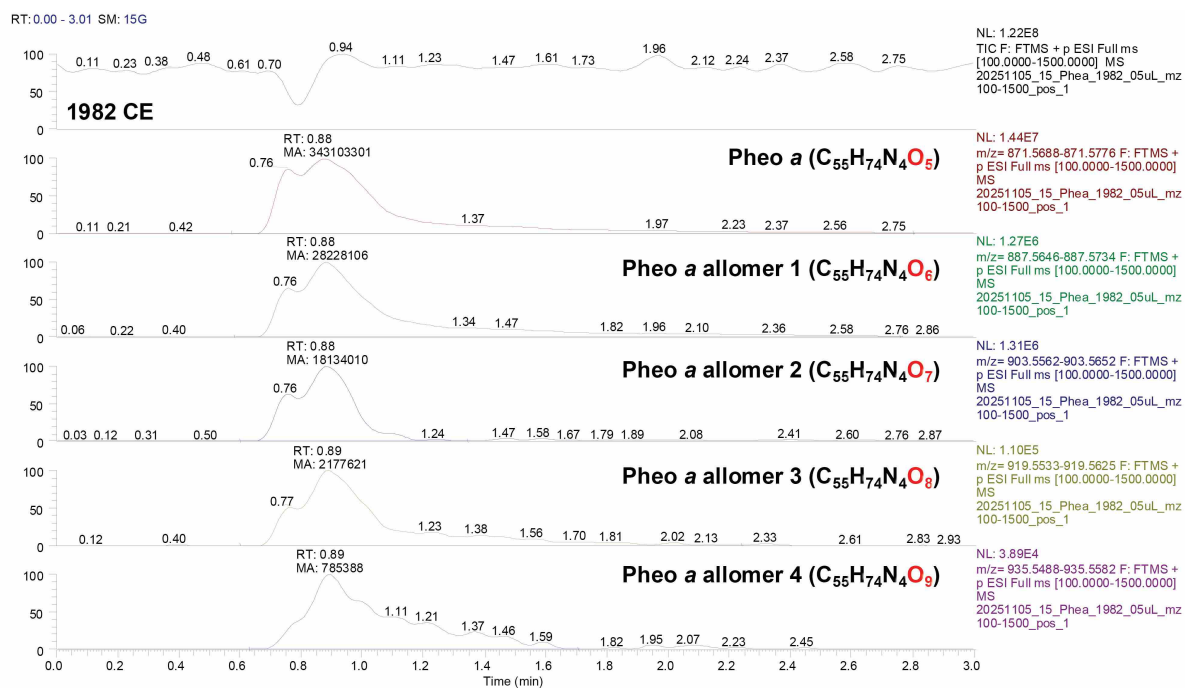

Figure S3e

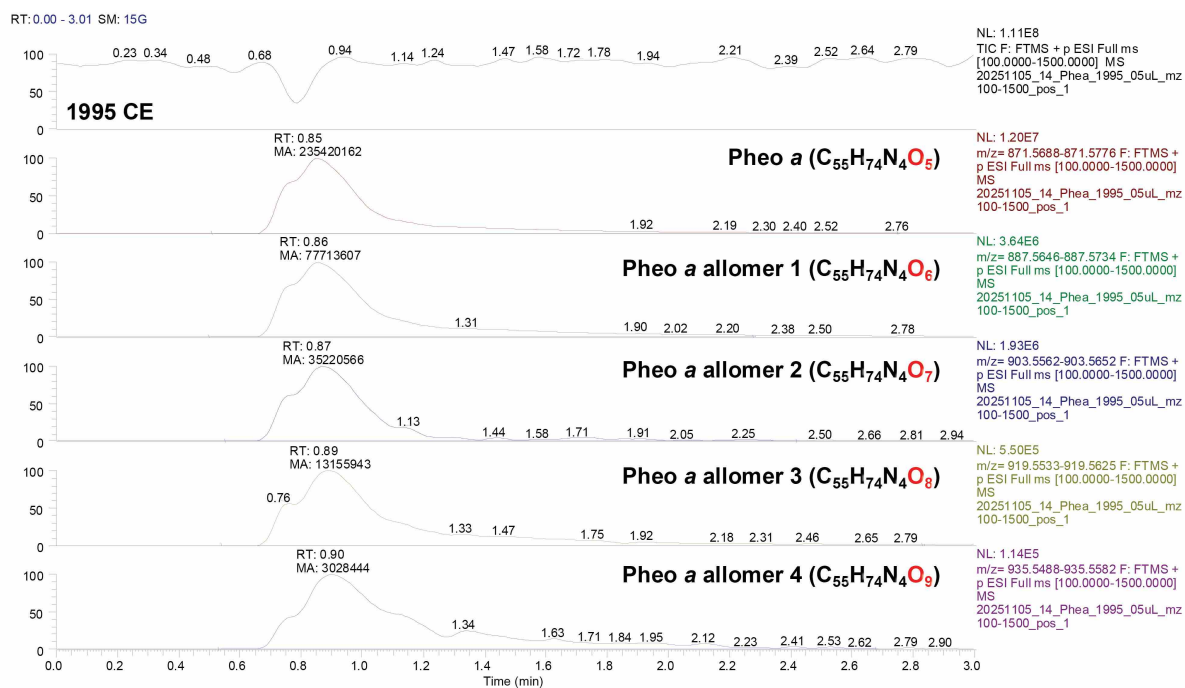

Figure S3f

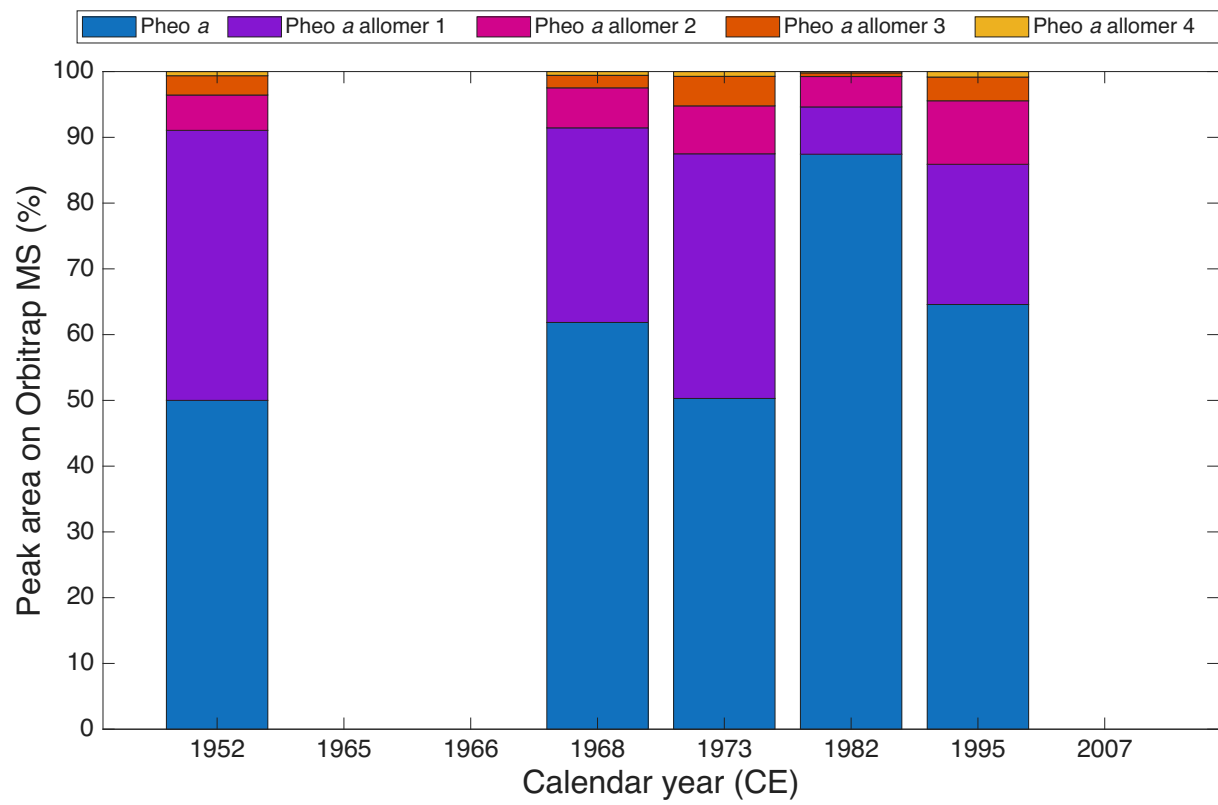

Figure S4

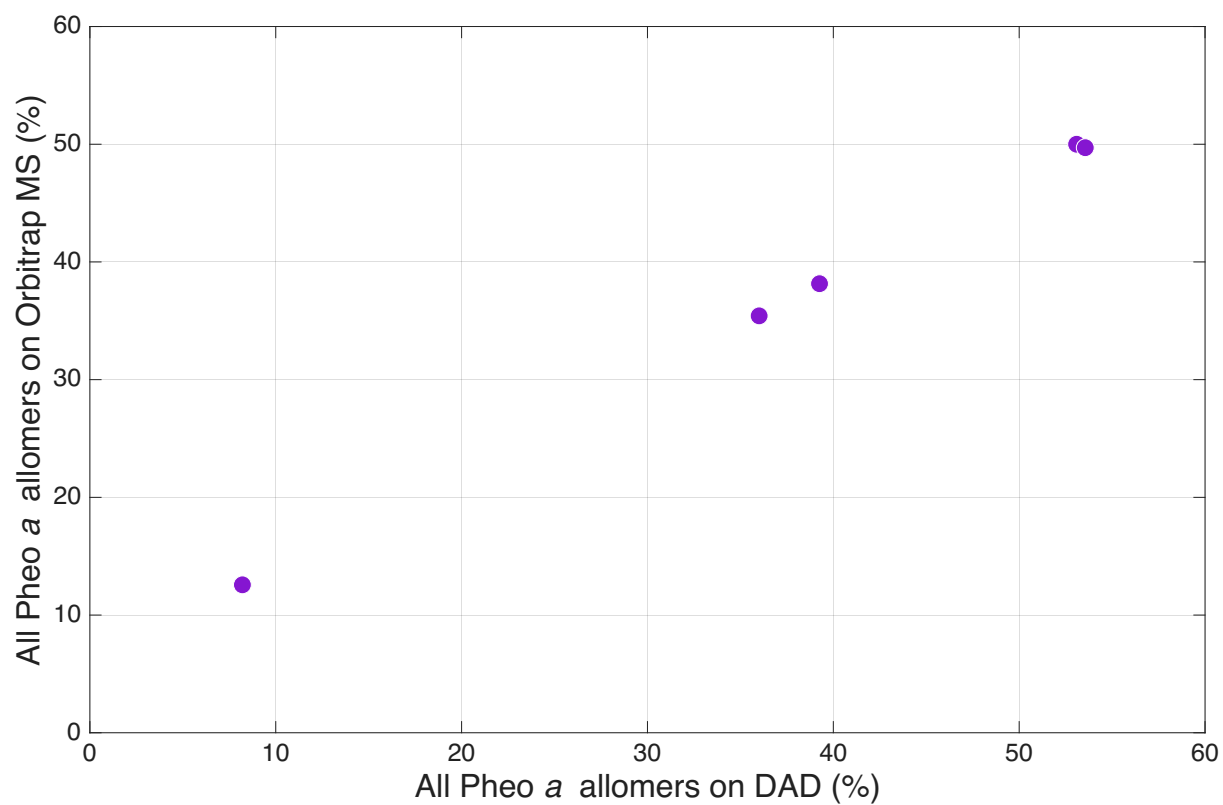

196

197 Figure S5

198

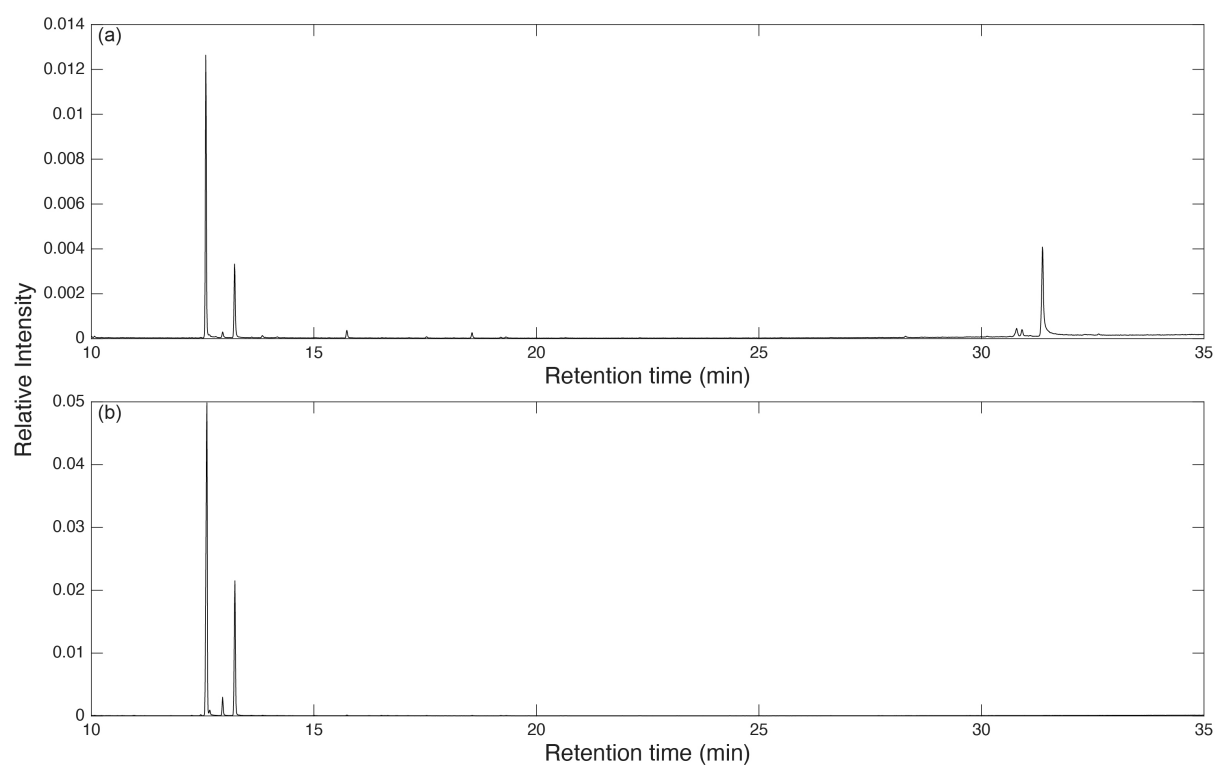

199

200 Figure S6

201

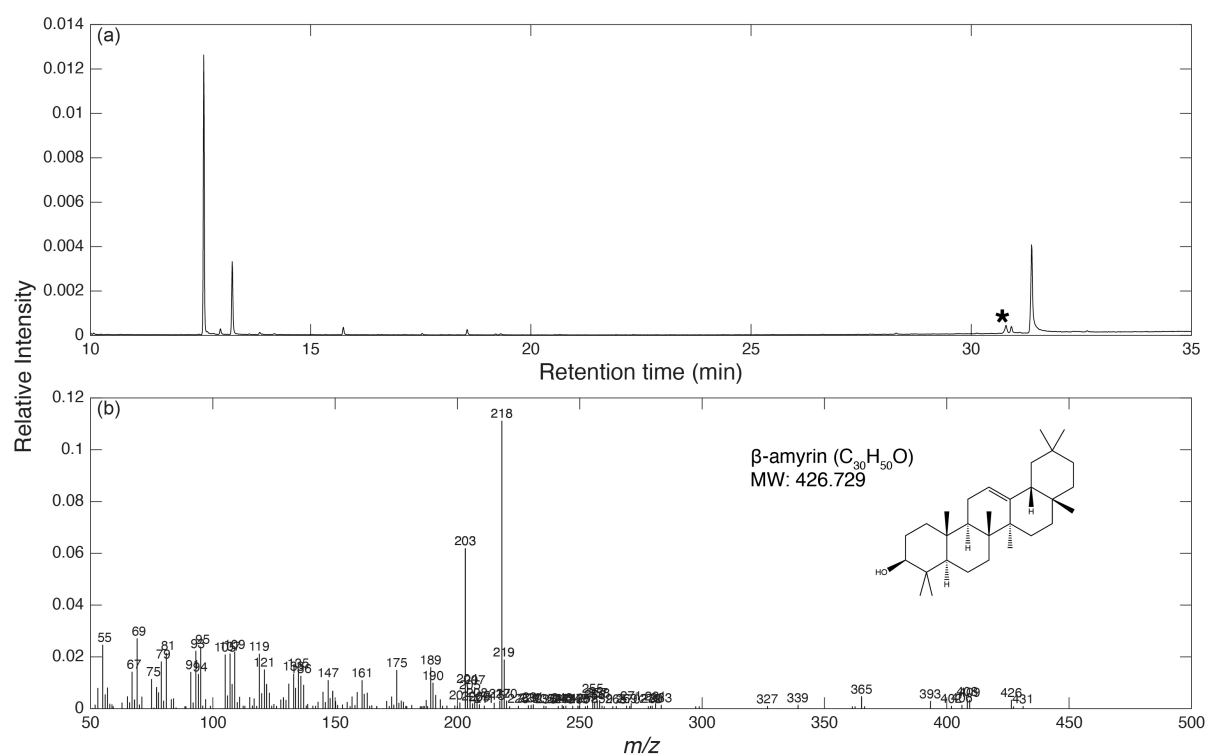

Figure S7

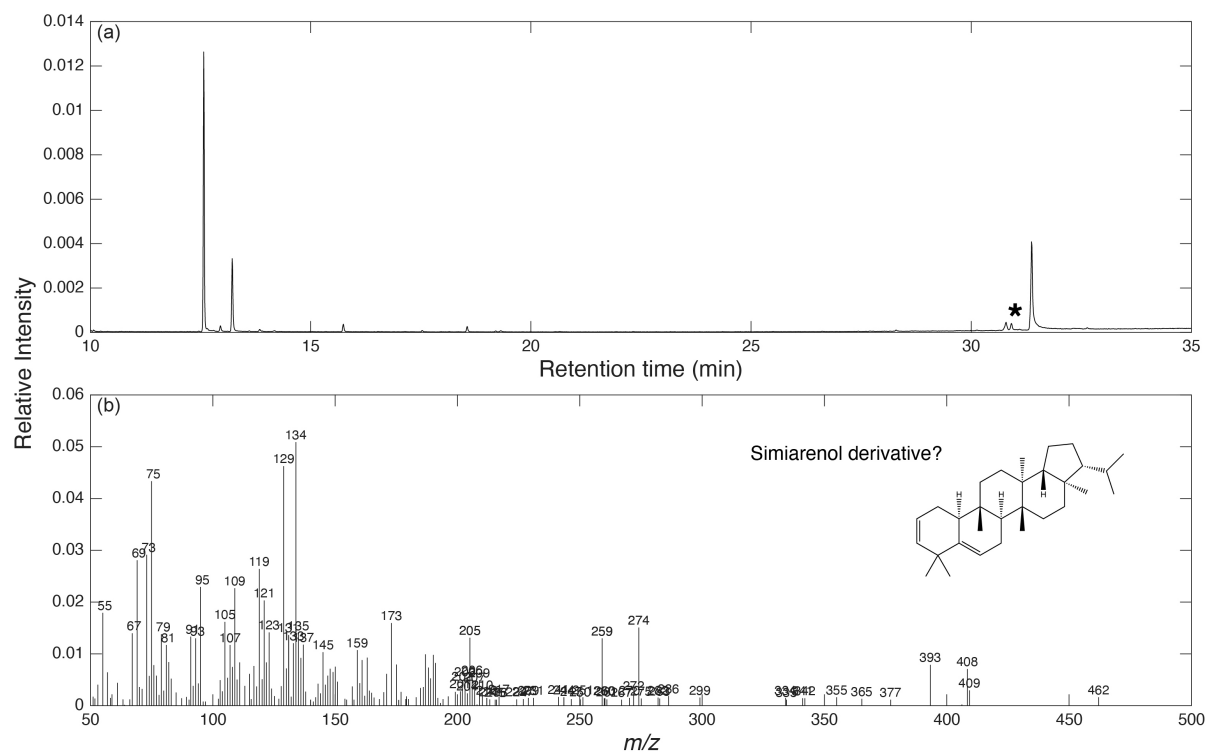

Figure S8

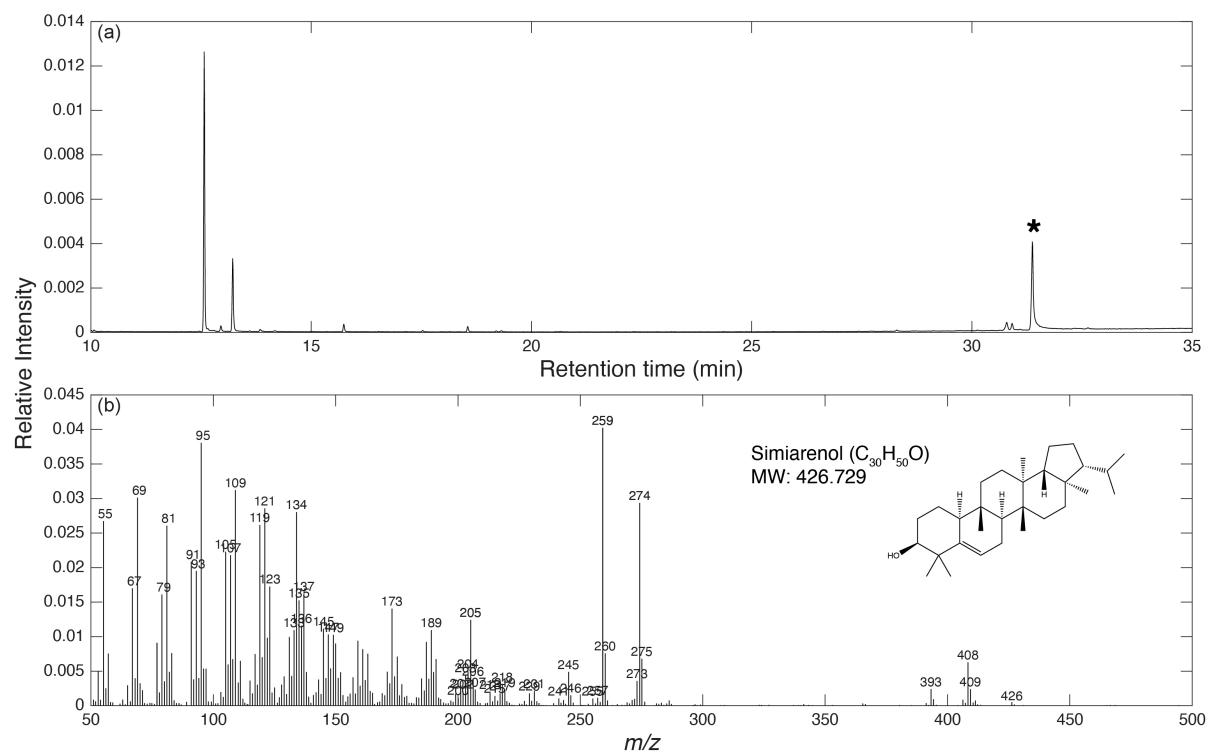

Figure S9



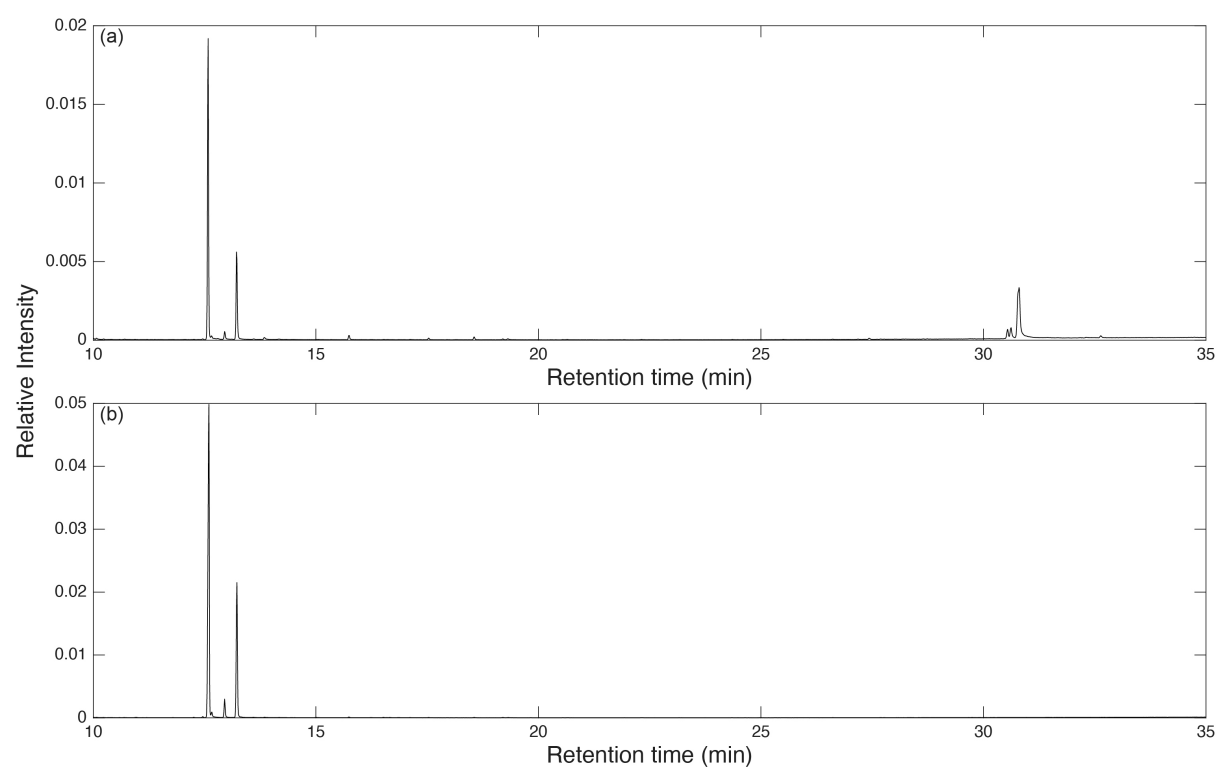

211

212 Figure S10

213

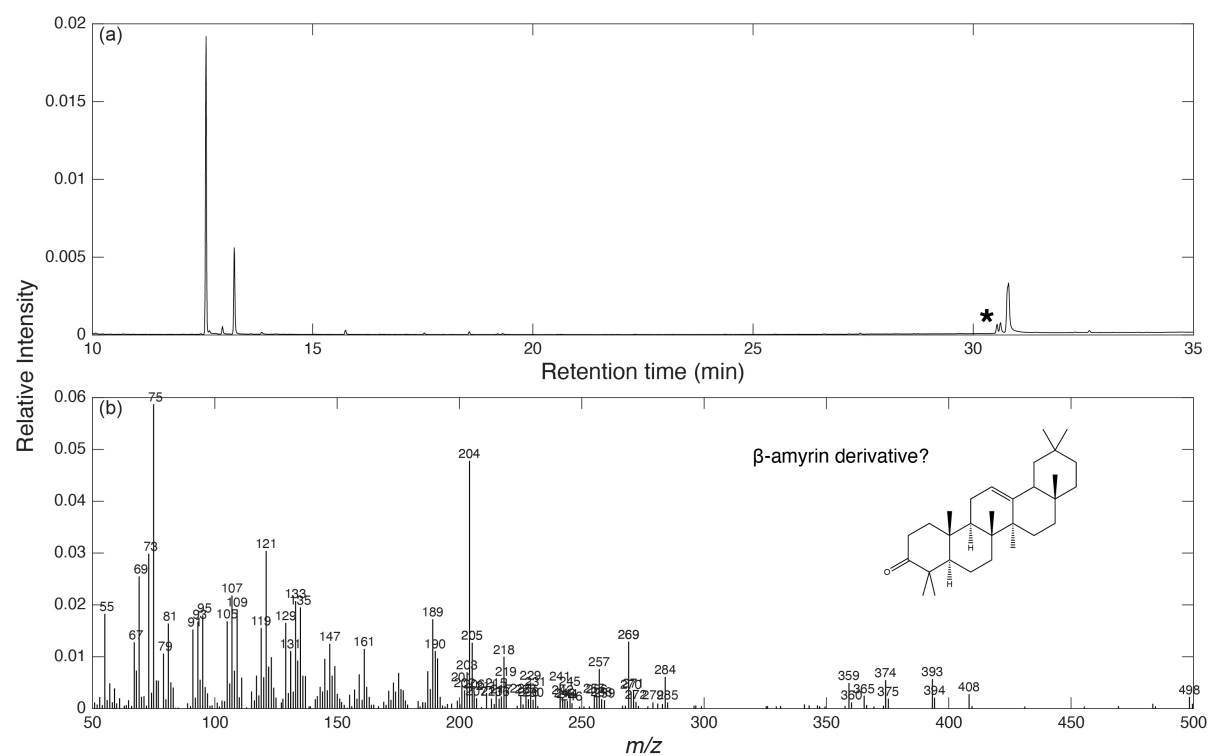

Figure S11

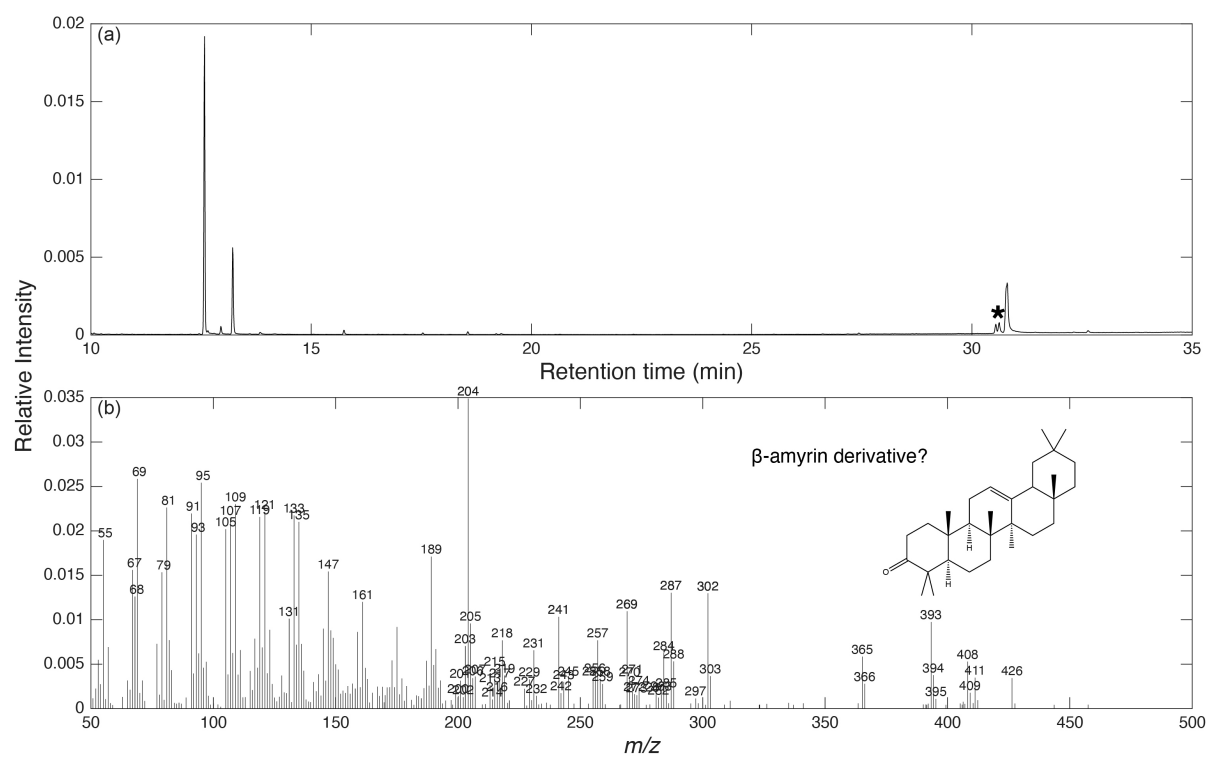

Figure S12

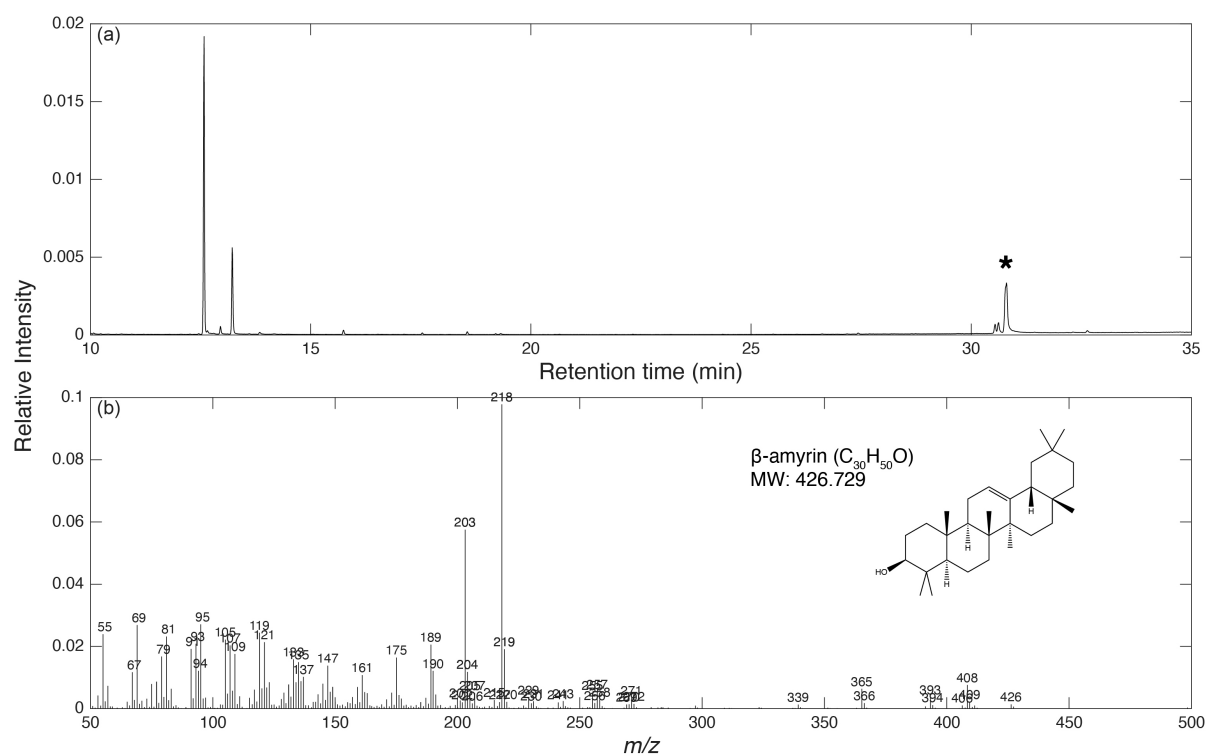

Figure S13

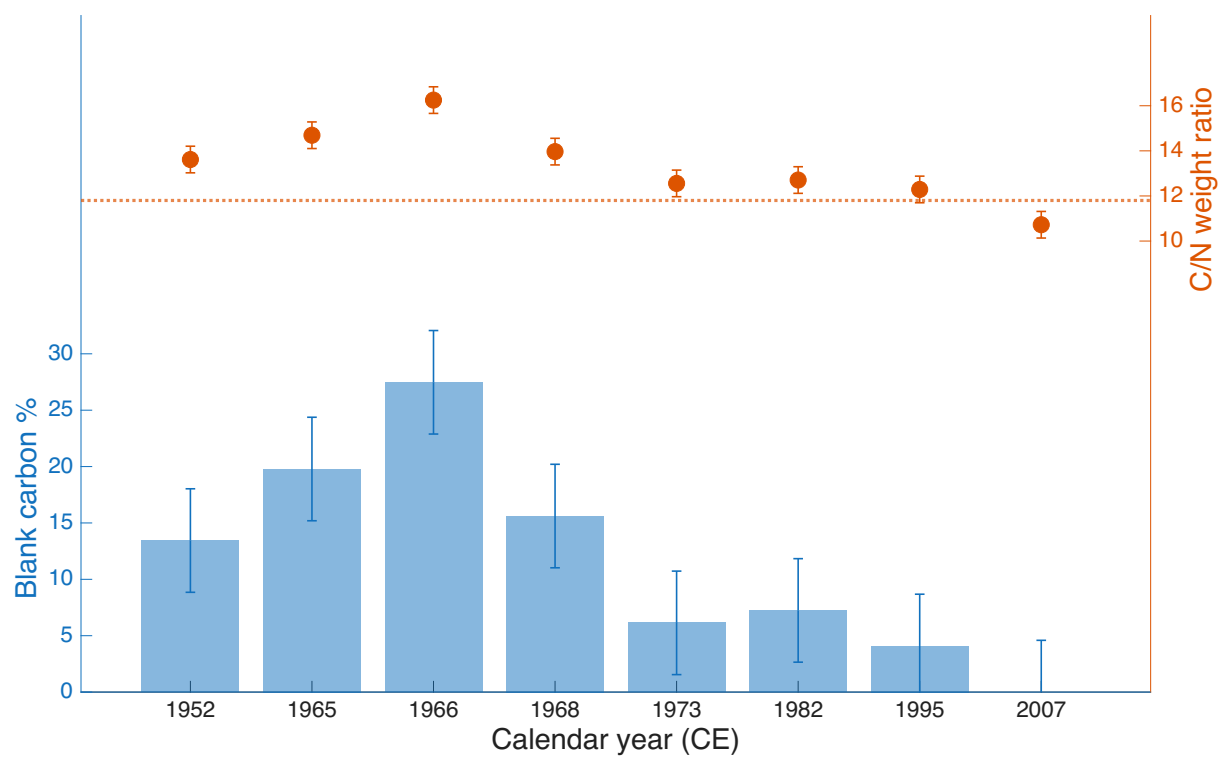

Figure S14

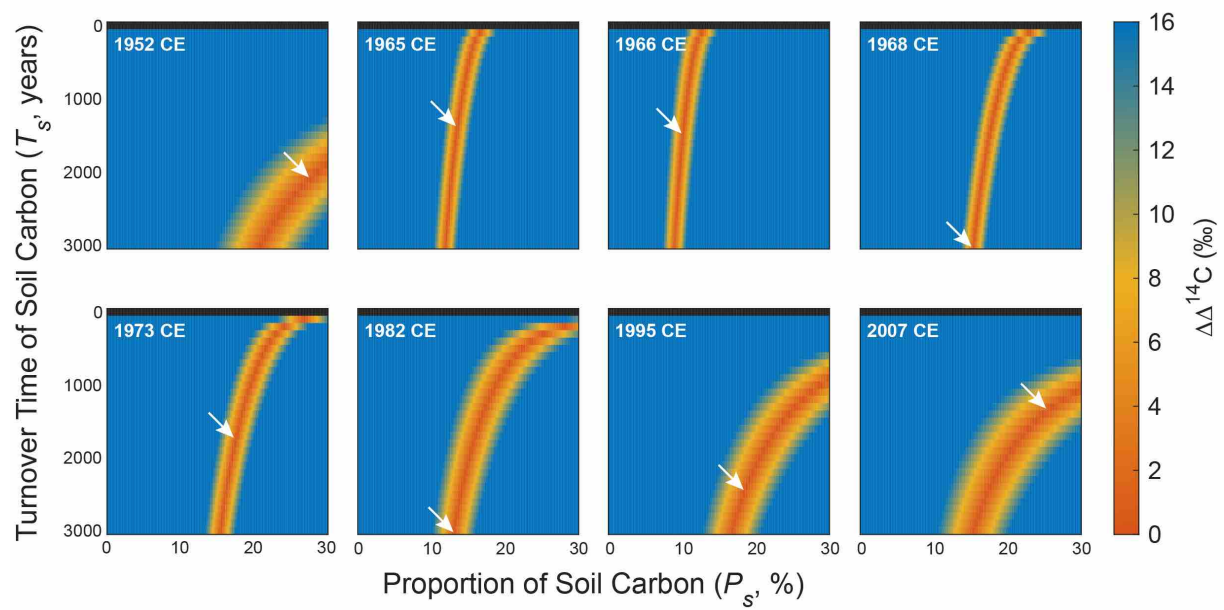

Figure S15

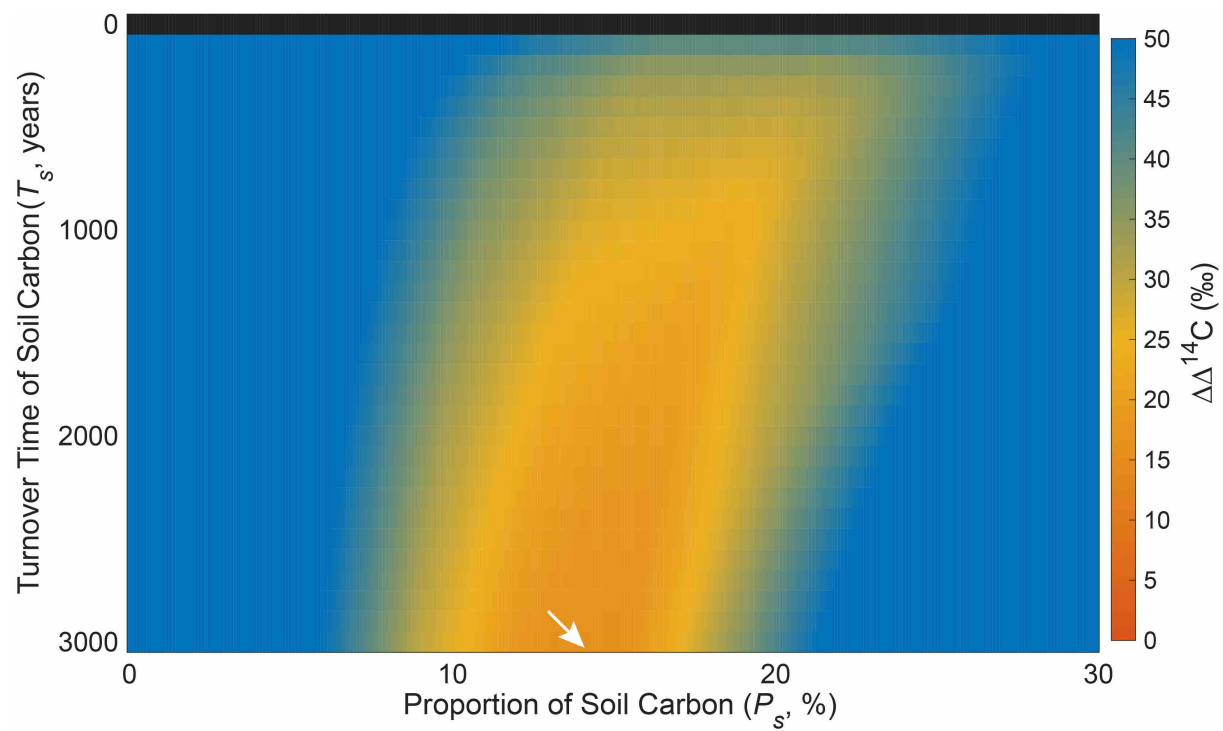

229

230 Figure S16
